# Supplementary material for: Sex-Dependent End-of-Life Mental and Vascular Scenarios for Compensatory Mechanisms in Mice with Normal and AD-Neurodegenerative Aging
Source: PubMed Central journal article supplement (PMC7911097; doi:10.3390/biomedicines9020111), 2021-01-24
Supplement: biomedicines-09-00111-s001.pdf [file biomedicines-09-00111-s001.pdf]

## *Mental health and cardiovascular function correlates*

The correlations between the different variables studied were evaluated with Pearson's correlation. The  $p < 0.01$  are illustrated.

### Physical phenotype

Systolic blood pressure

### rCBF

Angiogenesis

### Arterial properties

(+) Positive correlation

(-) Negative correlation

### CORNER TEST- Day 1

- Total corners: [Asymmetry index \(AI\) hippocampus](#), [AI Cortex \(Bregma -1.5mm\)](#); [AI Caudate Putamen](#)

### OPEN FIELD TEST- Day 1

- Latency of movement : [Whole brain CBF; all areas CBF](#)
- Exit of the center latency: [Whole brain CBF; Cortex CBF](#)
- Latency to enter the periphery: [AUC Acetylcholine \(% Phe\)](#)
- 1<sup>st</sup> minute rearings: [AUC Sodium nitroprusside \(% Phe\)](#); [pEC50 Sodium nitroprusside \(% Phe\)](#); [maximum effect Sodium nitroprusside \(% Phe\)](#)
- 2<sup>nd</sup> minute rearings: [AUC Sodium nitroprusside \(% Phe\)](#)
- Total rearings: [AUC Sodium nitroprusside \(% Phe\)](#)

### CORNER TEST- Day 2

- Total corners: [AI amygdala](#)

### OPEN FIELD TEST- Day 2

- 1<sup>st</sup> minute crossings: [AUC Sodium nitroprusside \(% Phe\)](#), [maximum effect Sodium nitroprusside \(% Phe\)](#); [AI amygdala](#)
- 2<sup>nd</sup> minute crossings: [AI amygdala](#)
- 4<sup>th</sup> minute crossings: [AUC Acetylcholine \(% Phe\)](#), [pEC50 AUC Acetylcholine \(% Phe\)](#)
- Total crossings: [AUC Sodium nitroprusside \(% Phe\)](#)
- 1<sup>st</sup> minute rearings: [AUC Sodium nitroprusside \(% Phe\)](#); [maximum effect Sodium nitroprusside \(% Phe\)](#)
- 2<sup>nd</sup> minute rearings: [AI amygdala](#)
- Total rearings: [AUC Sodium nitroprusside \(% Phe\)](#)
- Number of groomings: [Frailty index](#)

### DARK AND LIGHT TEST

- Latency of movement: [Cortex CBF](#)
- Stretch attendance latency: [AUC Acetylcholine \(% Phe\)](#), [maximum effect Acetylcholine \(% Phe\)](#), [AI Cortex \(Bregma -2.5mm\)](#)
- Time in Light [Body weight](#)

- Time of groomings: [Whole brain CBF, AI striatum \(Bregma -2.5mm\)](#)

#### **MARBLE TEST**

- Intact Marbles: [Corticosterone](#)
- Half buried Marbles: [Systolic blood pressure](#)

#### **T- MAZE TEST SPONTANEOUS ALTERNATION TASK**

- T- intersection latency: Systolic Blood Pressure, [AI Cortex](#)
- T- intersection with 4 paws latency: Systolic Blood Pressure

#### **T MAZE**

- T-intersection with 4 paws latency: Systolic Blood Pressure
- Error number: [Corticosterone](#); [pEC50 Phenylephrine \(% KCl\)](#), [AI Cortex \(Bregma - 1.5mm\)](#)

#### **MORRIS WATER MAZE**

- CUE 2 speed: [Cortex CBF](#)
- CUE 4 Time: [maximum effect Phenylephrine \(% KCl\)](#); [amygdala CBF](#)
- CUE 4 speed: [Striatum CBF](#)
- Mean CUE speed [Whole brain CBF](#)
- Place Task 1.1 speed: [Whole brain CBF, Striatum CBF, Hippocampus CBF](#)
- Place Task 1.3 speed: [Whole brain CBF, all areas CBF](#)
- Mean Place Task 1 speed: [pEC50 Phenylephrine \(% KCl\)](#), [Whole brain CBF, Striatum CBF](#)
- Place Task 2.2 Distance: [Frailty index, AI Caudate Putamen](#)
- Place Task 2.3 Distance: [Corticosterone](#)
- Place Task 2.4 Distance: [angiogenic growth aorta](#)
- Place Task 2.2 Speed: [pEC50 Phenylephrine \(% KCl\)](#)
- Place Task 2.4 Speed: [pEC50 Phenylephrine \(% KCl\)](#), [Whole brain CBF, Striatum CBF](#)
- Mean place task 2 distance [KCl, angiogenic growth aorta](#)
- Mean Place Task 2 speed [pEC50 Phenylephrine \(% KCl\)](#)

#### **Physical phenotype**

Body weight: [Amygdala CBF](#)

The functional correlates of the behavioral signatures were also analyzed for the corresponding group.

#### **Neophobia 3xTg-AD female Corner test (CT)/Open Field test (OF)**

- Corner test\_ Day 1\_ Total rearings: [pEC50 phenylephrine %KCl](#)
- Corner test\_ Day 2\_ Total corners: [Area under the curve phenylephrine \(AUC\) %KCl/ PEC50](#)
- Open Field test\_ Day 1\_ 1<sup>st</sup> minute crossings: [KCl](#)
- Open Field test\_ Day 1\_ 4<sup>th</sup> minute crossings: [KCl](#)
- Open Field test\_ Day 1\_ 1<sup>st</sup> minute rearings: [KCl](#)
- Open Field test\_ Day 1\_ 2<sup>nd</sup> and 4<sup>th</sup> minute rearings: [Phenylephrine \(% KCl\)](#)
- Open Field test\_ Day 2\_ 4<sup>th</sup> minute crossings: [KCl](#)
- Open Field test\_ Day 2\_ 1<sup>st</sup> minute rearings: [AUC Phenylephrine \(% KCl\)](#)
- Open Field test\_ Day 2\_ 3<sup>rd</sup> and 4<sup>th</sup> minute rearings [pEC50 Phenylephrine \(% KCl\)](#)

#### **Hyperactive pattern of male 3xTg-AD mice in the Open-field test**

- Open Field test\_ Day 1\_ 1<sup>st</sup> minute crossings: [Asymmetry Index \(AI\) striatum](#)
- Open Field test\_ Day 2\_ 1<sup>st</sup> minute crossings: **systolic blood pressure**
- Open Field test\_ Day 2\_ 2<sup>nd</sup> minute crossings: [PEC50 Acetylcholine \(% Phe\)](#)
- Open Field test\_ Day 2\_ 1<sup>st</sup>, 2<sup>nd</sup> minute and total crossings [AI amygdala](#)

#### **Disinhibitory behavior in male and female 3xTg-AD mice in the Dark-light box test**

- Stretch attendance latency: [AUC Acetylcholine \(% Phe\)](#); [AI cortex \(Bregma -2.5mm\)](#)
- Stretch attendance number: [maximum effect Acetylcholine \(% Phe\)](#)
- Time in light: [Frailty index](#)
- Time doing grooming: [Whole brain CBF, Striatum CBF, Caudate Putamen CBF, Amygdala CBF; AI striatum \(Bregma -2.5mm\)](#)

#### **Slower speed of female 3xTg-AD mice in the Morris water-maze**

- Place task 1.3 speed: [Whole brain CBF, Striatum CBF, Caudate Putamen CBF](#)
- Place task 2.3 speed: [Hippocampus CBF](#)
- Place task 2.4 speed: [Striatum CBF](#)

#### **Paradoxical performances of male 3xg-AD in Morris water-maze**

- CUE 2 Time: [PEC50 Acetylcholine \(% Phe\)](#)
- CUE 3 Time: [Whole brain CBF, Striatum CBF, Caudate Putamen CBF](#)
- Place Task 1.3 Time/Distance: [AI cortex \(Bregma -1.5mm\)](#)
- Place Task 2.1 Distance: [PEC 50 Sodium nitroprusside \(% Phe\)](#)
